# Supplementary material for: Glucose 6-phosphate dehydrogenase 6-phosphogluconolactonase: characterization of the Plasmodium vivax enzyme and inhibitor studies
Source: Springer Nature journal article supplement (doi:10.1186/s12936-019-2651-z), 2019-01-25
Supplement: MOESM5 [file 16421172]

**Additional file 5. Amino acid sequence alignment of *PfGluPho* (PF3D7\_1453800) and *PvGluPho* (PVX\_117790).**

|                 |     |                                                                                             |     |
|-----------------|-----|---------------------------------------------------------------------------------------------|-----|
| <i>PfGluPho</i> | 1   | MDYENFVKSAEEINNHLHNVNYLETKDLNDFNWKAAYYICKEIYDKQQINK                                         | 50  |
|                 |     | . : . . .     .   : :   :       .       .       .       .   :         . :   . :     . . . : |     |
| <i>PvGluPho</i> | 1   | MDCQALAKSLEQMNHLHNVKYLEAKDLTDFNQKSAYYICHQIAEKQLSKE                                          | 50  |
| <i>PfGluPho</i> | 51  | DGYVVIGLSGGRTPIDVYKNMCLIKDIKIDKSKLIFFIIDERYKSDDHKF                                          | 100 |
|                 |     | .   :               :               . :   :           .                       .             |     |
| <i>PvGluPho</i> | 51  | GGHVVIGLSGGKTPIDVYKNIALVKDIKIDT SKLIFFIIDERYKRDDHKF                                         | 100 |
| <i>PfGluPho</i> | 101 | SNYNNIKFLFHNLNINEKEQLYKPDTTKSIVDCILDYNDKIKIMIEKYKK                                          | 150 |
|                 |     | . :   .               :     :   :   :   : .     :     .   : :     .                         |     |
| <i>PvGluPho</i> | 101 | SNYNNIKFLFESLKINEKEQLYRPDTSKNIVECVRDYNEKIKNMVKKYTK                                          | 150 |
| <i>PfGluPho</i> | 151 | VDIAILGMGSDFHASLFPNIFYNIYMNNYQNNYIYNEKTLDFINNDQ--                                           | 198 |
|                 |     | :               :     :   . : . . .   : : .                                                 |     |
| <i>PvGluPho</i> | 151 | VDIAILGMGSDFHASLFPNIFNFIYMNNYQNSYIYDESSIKVANSNDTS                                           | 200 |
| <i>PfGluPho</i> | 199 | DNDNLKYLKEYVYFTTTNQFDVRKRITVSLNLLANASSKIFLLNSKDKLD                                          | 248 |
|                 |     | . .                   .                   :     .                   .                       |     |
| <i>PvGluPho</i> | 201 | DNDNLDLLKEYVYFTTTNFDVRKRITVSLDLLGNASSKIFLLNSTDKLD                                           | 250 |
| <i>PfGluPho</i> | 249 | LWKNMLIKSYIEVNYNLYPATYLIDTSCTNENVNINNNNNNNNNKKNNYC                                          | 298 |
|                 |     | :       : :       .       .       : .                                                       |     |
| <i>PvGluPho</i> | 251 | LWKNMLLKS YVDVNYCLYPAVYLIDSM-----                                                           | 277 |
| <i>PfGluPho</i> | 299 | YSNTTVISCGYENYTKSIEEIYDSKYALSLSNSLNKEELLTIIIFGCSG                                           | 348 |
|                 |     | : :       .     . : . :   :     .   . . . :     :   .       : .   .         :               |     |
| <i>PvGluPho</i> | 278 | --NTTVVTCGYTNPQMLEDIYVSNSSLSVHSPSLNRRECLTIIIVFGCSG                                          | 325 |
| <i>PfGluPho</i> | 349 | DLAKKKIYPALFKLFCNNSLPKDLLIIGFARTVQDFDTFFDKIVIYLRKC                                          | 398 |
|                 |     | :             . .             :         .   .   :           .                               |     |
| <i>PvGluPho</i> | 326 | DLAKKKIYPAIFKLFCKRRLPKDLLIVGFARTAQSFD SFFDKIVGYLRKC                                         | 375 |
| <i>PfGluPho</i> | 399 | LLCYEDWSISKKKDLLNGFKNRCRYFVGNYSSESFENFNKYLT TIEEEE                                          | 448 |
|                 |     | . .       .   : : :           .       :       : :   :             .           . :   .   .   |     |
| <i>PvGluPho</i> | 376 | LHSYEDLSLTQKKDLLNCFKNKCRYIIGDYSSSESFERFNKYLTQLEREN                                          | 425 |
| <i>PfGluPho</i> | 449 | ----AKKKYYATCYKMN-----GSDYNIS                                                               | 468 |
|                 |     | . . . : .   . . . . :   . . . . :   . . . . :                                               |     |
| <i>PvGluPho</i> | 426 | LIGTAPTSWAAAAGNASFANDTDKVEHHPDEAILAKGTGAATPGEAPGGA                                          | 475 |
| <i>PfGluPho</i> | 469 | NNVAEDNISIDDENKTNEYFQ-MCTPKNCPDNVFSNYPYVINRMLYL                                             | 517 |
|                 |     | .   . . . . : . . . .   . . . . .   . . .   . : . . . . .   . .   . :       :               |     |
| <i>PvGluPho</i> | 476 | NGPATHGEAHGGANGLSTPMQGKAVPTDDTSDEGHSGANHPFAINRILYL                                          | 525 |
| <i>PfGluPho</i> | 518 | ALPPHIFVSTLKNYKKNCLNSKGTDKILLEKPFGNLDL SFKMLSKQILEN                                         | 567 |
|                 |     | .   . .                           .     . :     :                                           |     |
| <i>PvGluPho</i> | 526 | ALPPHIFVSTLKNYKKNQNGNGTDKILLEKPFKDLQTFKVL SKQILEN                                           | 575 |
| <i>PfGluPho</i> | 568 | FNEQQIYRIDHYLGKDMVSGLLKLFKFTNTFLLSLMNRHF IKIKITLKET                                         | 617 |
|                 |     | .                                                                                           |     |
| <i>PvGluPho</i> | 576 | FNEEHYRIDHYLGKDMVSGLLKLFKFTNTFLLSLMNRHF IKIKITLKET                                          | 625 |

|                  |     |                                                       |     |
|------------------|-----|-------------------------------------------------------|-----|
| <i>Pf</i> GluPho | 618 | KG VYGRGQYFDPYGIIRDVMQNHMLQLLTLITMEDPIDLNDESVKNEKIK   | 667 |
|                  |     |                                                       |     |
| <i>Pv</i> GluPho | 626 | KG VYGRGQYFDPYGIIRDVMQNHMLQLLALITMEDPIDLNDESVKNEKIK   | 675 |
| <i>Pf</i> GluPho | 668 | ILKSIPSIKLEDTIIGQYEKAENFKEDEN-----NDD----ESKKNHSYH    | 708 |
|                  |     | . .    : :     .  : : : :    :      :                 |     |
| <i>Pv</i> GluPho | 676 | ILKCIQSIKLDNTIIGQYVKSENYQEEKNLSAPPSDDHPVDESKRNHSYH    | 725 |
| <i>Pf</i> GluPho | 709 | DDPHIDKNSITPTFCTCILYINSINWYGVPIIFKSGKGLNKDICEIRIQF    | 758 |
|                  |     | .                                                     |     |
| <i>Pv</i> GluPho | 726 | DDPHIDSNSITPTFCTCILYINSINWYGVPIIFKAGKGLNKDICEIRLQF    | 775 |
| <i>Pf</i> GluPho | 759 | HNIMGSSDENMNNNEFV IILQPVEAIY LKMMIKKTGCEEMEEVQLNLTVN  | 808 |
|                  |     | : .                                                   |     |
| <i>Pv</i> GluPho | 776 | HNIMGSSDESMYNNNEFV IILQPVEVIY LKMMIKKTGCEEMEEVQLNLTVN | 825 |
| <i>Pf</i> GluPho | 809 | EKNKKINVPEAYETLLLECFKGHKKKFISDEELYESWRIFTPLLKELQEK    | 858 |
|                  |     | .     .       : .                                     |     |
| <i>Pv</i> GluPho | 826 | HKNKKNYVPEAYETLLLECFRGFKKKFISDEELYESWRIFTPLLNELQEK    | 875 |
| <i>Pf</i> GluPho | 859 | QVKPLKYSFGSSGPKEV FGLVKKYNYGKNYTHRPEFVRKSSFYEDDLLD    | 908 |
|                  |     | : :     .       : .      :.:. .                       |     |
| <i>Pv</i> GluPho | 876 | KVQPLKYPFGSSGPKEVYDLVKKYNYGKNYANTPAFVRKSSFYEDDLLD     | 925 |
| <i>Pf</i> GluPho | 909 | IN 910                                                |     |
|                  |     |                                                       |     |
| <i>Pv</i> GluPho | 926 | IN 927                                                |     |
